# Supplementary material for: Small molecule fixation by a dithiadiazolyl radical: X-ray crystal structures of (CF3C6H3FCNSSN)2and (CF3C6H3FCNSSN)2˙G (G = N2, Ar, CO2and SO2)
Source: Royal Society of Chemistry journal article supplement (doi:10.1039/b307509p), 2003-01-01
Supplement: b307509p.doc [file b307509p.doc]

**SUPPORTING INFORMATION**

**Small molecule fixation by a dithiadiazolyl radical: X-ray crystal structures of (CF3C6H3FCNSSN)2 and (CF3C6H3FCNSSN)2.G (G = N2, Ar, CO2 and SO2)**

_____________________________________________________________________

**Caroline S. Clarke, Delia A. Haynes, Jeremy M. Rawson* and Andrew D. Bond**

*a) Department of Chemistry, The University of Cambridge, Lensfield Road, Cambridge UK, CB2 1EW. E-mail jmr31@cus.cam.ac.uk*

# S1. Single-crystal X-ray diffraction: refinement of inclusion complexes

The structures of all of the inclusion complexes **1**–**1** display similar behaviour. In each case, all atoms of the dithiadiazolyl radical can be located and refined satisfactorily to give *R*1 *ca*. 9% and *wR*2 *ca*. 30%. Residual electron density remains, distributed throughout the channels (along the *c* direction). This cannot be resolved into any meaningful atomic positions and was treated, therefore, using the *SQUEEZE* procedure (P. v.d. Sluis & A. L. Spek, *Acta Crystallogr.* 1990, **A46**, 194.), implemented in *PLATON* (*PLATON*, A Multipurpose Crystallographic Tool, Utrecht University, Utrecht, The Netherlands, A. L. Spek, 1998.). In each case, the electron density was estimated in the range 243–270 electrons per unit cell, and correction of the *F*(obs) data to remove its contribution resulted in *R*1 falling to *ca*. 5%, *wR*2 falling to *ca*. 15% and the residual electron density falling to well below 1 electron per Å3 (see table). Identification of the included species as N2, CO2, Ar and SO2 is reliant upon additional chemical evidence; it cannot be deduced from the X-ray data alone. The estimated number of included molecules per unit cell (deduced from the residual electrons) is consistent with the molecular sizes, *i.e.* amount included: Ar > N2 > CO2 > SO2.

The submitted CIFs are those resulting from refinement against the “squeezed” data.

|  | **Before *SQUEEZE* procedure** | | |  |  | **After *SQUEEZE* procedure** | | |
| --- | --- | --- | --- | --- | --- | --- | --- | --- |
|  | ***R*1** | ***wR*2** | ****  **(max, min)** | **Residual electrons per cell** | **No. of included molecules** | ***R*1** | ***wR*2** | ****  **(max, min)** |
| **1** | 0.0929 | 0.2886 | 2.43, -0.57 | 243 | 8.7 (N2) | 0.0496 | 0.1449 | 0.49, -0.32 |
| **1** | 0.0890 | 0.2854 | 2.53, -0.65 | 267 | 6.1 (CO2) | 0.0519 | 0.1545 | 0.57, -0.36 |
| **1** | 0.0897 | 0.2913 | 2.78, -0.61 | 270 | 15.0 (Ar) | 0.0479 | 0.1512 | 0.70, -0.35 |
| **1** | 0.0905 | 0.3401 | 2.80, -0.62 | 266 | 4.2 (SO2) | 0.0520 | 0.1513 | 0.65, -0.47 |

# S2. Single-crystal X-ray diffraction: crystallographic data for inclusion complexes 1, 1, 1 and 1.

All data were collected at 180(2)K.

| Crystal |  | ———————— Co-crystal form —————————— | | | |
| --- | --- | --- | --- | --- | --- |
| Data | Pure **1** | N2 (**1**) | CO2 (**1**) | Ar (**1**) | SO2 (**1**) |
| *Crystal System* | Triclinic | Orthorhombic | Orthorhombic | Orthorhombic | Orthorhombic |
| *Space Group* | *P-1* | *Pbcn* | *Pbcn* | *Pbcn* | *Pbcn* |
| *a* (Å) | 10.6611(6) | 17.1674(8) | 17.1277(7) | 17.1483(6) | 17.1333(2) |
| *b* (Å) | 11.6471(5) | 23.2395(11) | 23.2356(10) | 23.2411(8) | 23.2358(3) |
| *c* (Å) | 16.0947(5) | 10.6653(4) | 10.6532(2) | 10.6610(2) | 10.6538(4) |
|  (o) | 75.318(3) | 90 | 90 | 90 | 90 |
|  (o) | 79.351(3) | 90 | 90 | 90 | 90 |
|  (o) | 89.511(2) | 90 | 90 | 90 | 90 |
| *V* (Å3) | 1898.4(2) | 4255.0(3) | 4239.7(3) | 4248.9(2) | 4241.3(1) |
| *Z* | 8 | 16 | 16 | 16 | 16 |
| *M* | 267.24 | 282.37 | 283.96 | 304.79 | 283.90 |
| *No. reflections* | 15483 | 15146 | 24190 | 23982 | 21236 |
| *Unique data* | 6425 | 3736 | 3741 | 3753 | 4847 |
| *Rint* | 0.0494 | 0.0684 | 0.0756 | 0.0636 | 0.0614 |
| *R1(I>2(I))* | 0.0471 | 0.0498 | 0.0518 | 0.0483 | 0.0519 |
| *wR2(all data)* | 0.1626 | 0.1360 | 0.1538 | 0.1504 | 0.1460 |
| *Goodness of fit,S* | 1.05 | 0.95 | 1.05 | 1.04 | 1.07 |
